# Supplementary material for: Stereoselective polymerization of methyl methacrylate and rac-lactide mediated by iminomethylpyridine based Cu(ii) complexes
Source: Royal Society of Chemistry journal article supplement (doi:10.1039/d0ra00805b), 2020-01-01

## Stereoselective polymerization of methyl methacrylate and *rac*-lactide mediated by iminomethylpyridine based Cu(II) complexes

Jaegyeong Lee<sup>a</sup>, Minyoung Yoon<sup>a</sup>, Hyosun Lee,<sup>a,\*</sup> and Saira Nayab<sup>b,\*</sup>

### Electronic Supporting Information

---

|                                                                                                                                                                                        |           |
|----------------------------------------------------------------------------------------------------------------------------------------------------------------------------------------|-----------|
| <b>FIGURE S1.</b> FT-IR spectra of [L <sub>A</sub> CuCl <sub>2</sub> ].                                                                                                                | <b>03</b> |
| <b>FIGURE S2.</b> FT-IR spectra of [L <sub>B</sub> Cu(μ-Cl)Cl] <sub>2</sub> .                                                                                                          | <b>04</b> |
| <b>FIGURE S3.</b> FT-IR spectra of [L <sub>C</sub> CuCl <sub>2</sub> ].                                                                                                                | <b>05</b> |
| <b>FIGURE S4.</b> FT-IR spectra of [L <sub>D</sub> CuCl <sub>2</sub> ].                                                                                                                | <b>06</b> |
| <b>FIGURE S5.</b> FT-IR spectra of [L <sub>E</sub> CuCl <sub>2</sub> ].                                                                                                                | <b>07</b> |
| <b>FIGURE S6.</b> FT-IR spectra of [L <sub>F</sub> CuCl <sub>2</sub> ].                                                                                                                | <b>08</b> |
| <b>FIGURE S7.</b> Summary of elemental analysis of the synthesized Cu(II) complexes.                                                                                                   | <b>09</b> |
| <b>FIGURE S8.</b> <sup>1</sup> H NMR spectrum of PLA obtained with [L <sub>B</sub> Cu(μ-Cl)Me] <sub>2</sub> at room temperature, indicating complete conversion of monomer to polymer. | <b>10</b> |
| <b>FIGURE S9.</b> Homodecoupled <sup>1</sup> H NMR spectrum of PLA obtained with [L <sub>B</sub> Cu(μ-Cl)Me] <sub>2</sub> at room temperature.                                         | <b>11</b> |
| <b>FIGURE S9-1.</b> Extended range of homodecoupled <sup>1</sup> H NMR spectrum of PLA obtained with [L <sub>B</sub> Cu(μ-Cl)Me] <sub>2</sub> at room temperature.                     | <b>12</b> |
| <b>FIGURE S9-2.</b> Check monomer peak in <sup>1</sup> H NMR spectrum of PLA obtained with [L <sub>B</sub> Cu(μ-Cl)Me] <sub>2</sub> at room temperature.                               | <b>13</b> |
| <b>FIGURE S10.</b> Homodecoupled <sup>1</sup> H NMR spectrum of PLA obtained with [L <sub>B</sub> Cu(μ-Cl)Me] <sub>2</sub> at -25 °C.                                                  | <b>14</b> |
| <b>FIGURE S10-1.</b> Extended range of homodecoupled <sup>1</sup> H NMR spectrum of PLA obtained with [L <sub>B</sub> Cu(μ-Cl)Me] <sub>2</sub> at -25 °C.                              | <b>15</b> |
| <b>FIGURE S10-2.</b> Check monomer peak in homodecoupled <sup>1</sup> H NMR spectrum of PLA obtained with [L <sub>B</sub> Cu(μ-Cl)Me] <sub>2</sub> at -25 °C.                          | <b>16</b> |
| <b>FIGURE S10-3.</b> Check monomer peak in <sup>1</sup> H NMR spectrum of PLA obtained with [L <sub>B</sub> Cu(μ-Cl)Me] <sub>2</sub> at -25 °C.                                        | <b>17</b> |
| <b>FIGURE S11.</b> Representative <sup>1</sup> H NMR spectrum for calculating tacticity of the results                                                                                 | <b>18</b> |

---

PMMA obtained with  $[\mathbf{L}_E\mathbf{CuCl}_2]$ .

**Table S1.** Crystal data and structure refinement data for Cu(II) complexes. **19**

**Table S2.** Selected bond lengths (Å) and angles (°) of Cu(II) complexes. **21**

**Scheme S1.** Proposed mechanism for ROP of *rac*-LA catalyzed by  $[\mathbf{L}_n\mathbf{CuMe}_2]$  ( $\mathbf{L}_n = \mathbf{L}_A - \mathbf{L}_F$ ). **22**

---

FIGURE S1

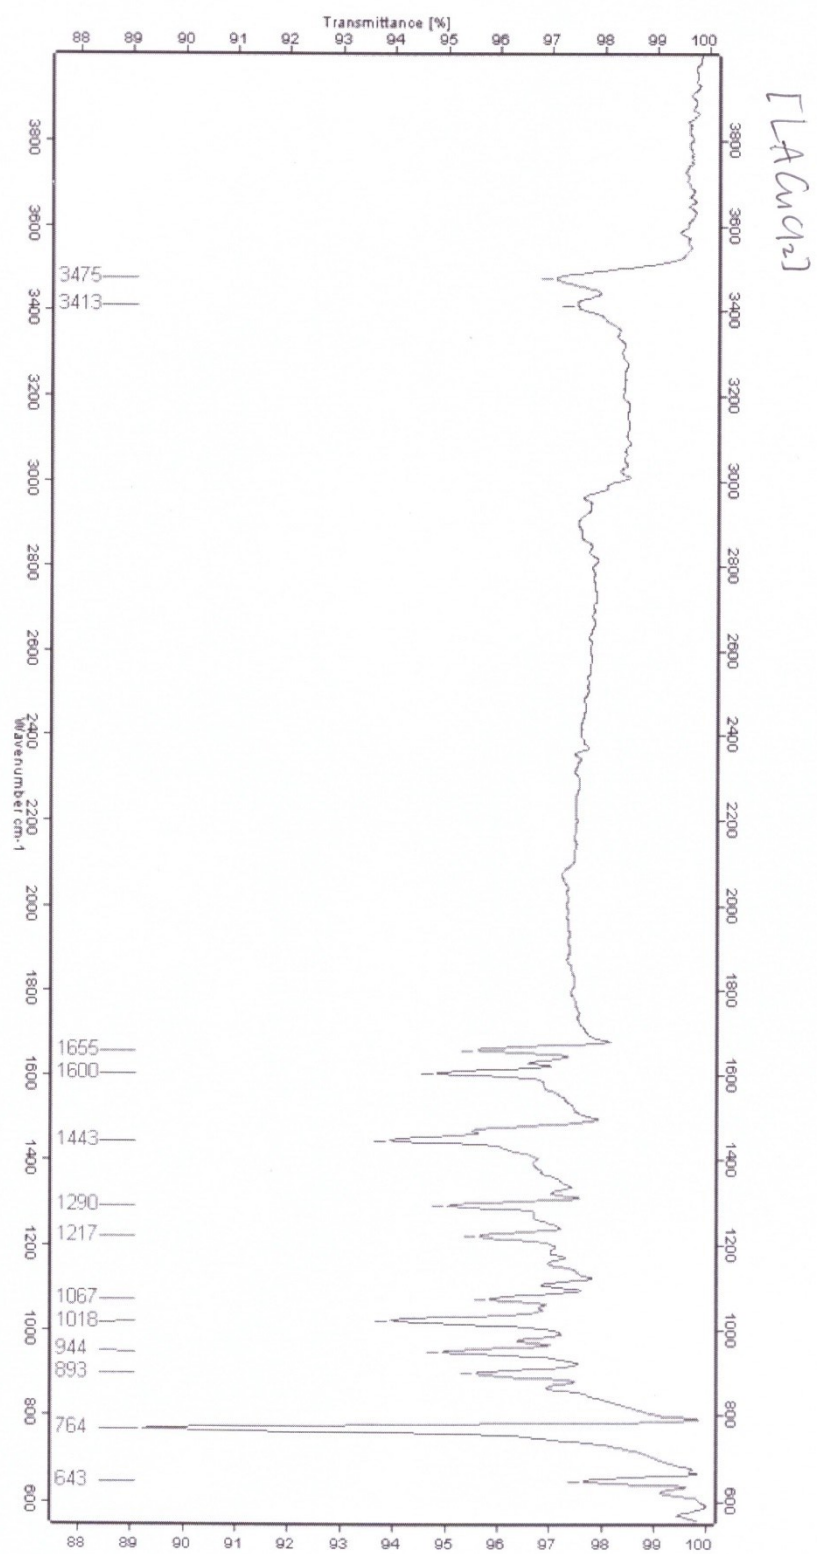

FIGURE

S2

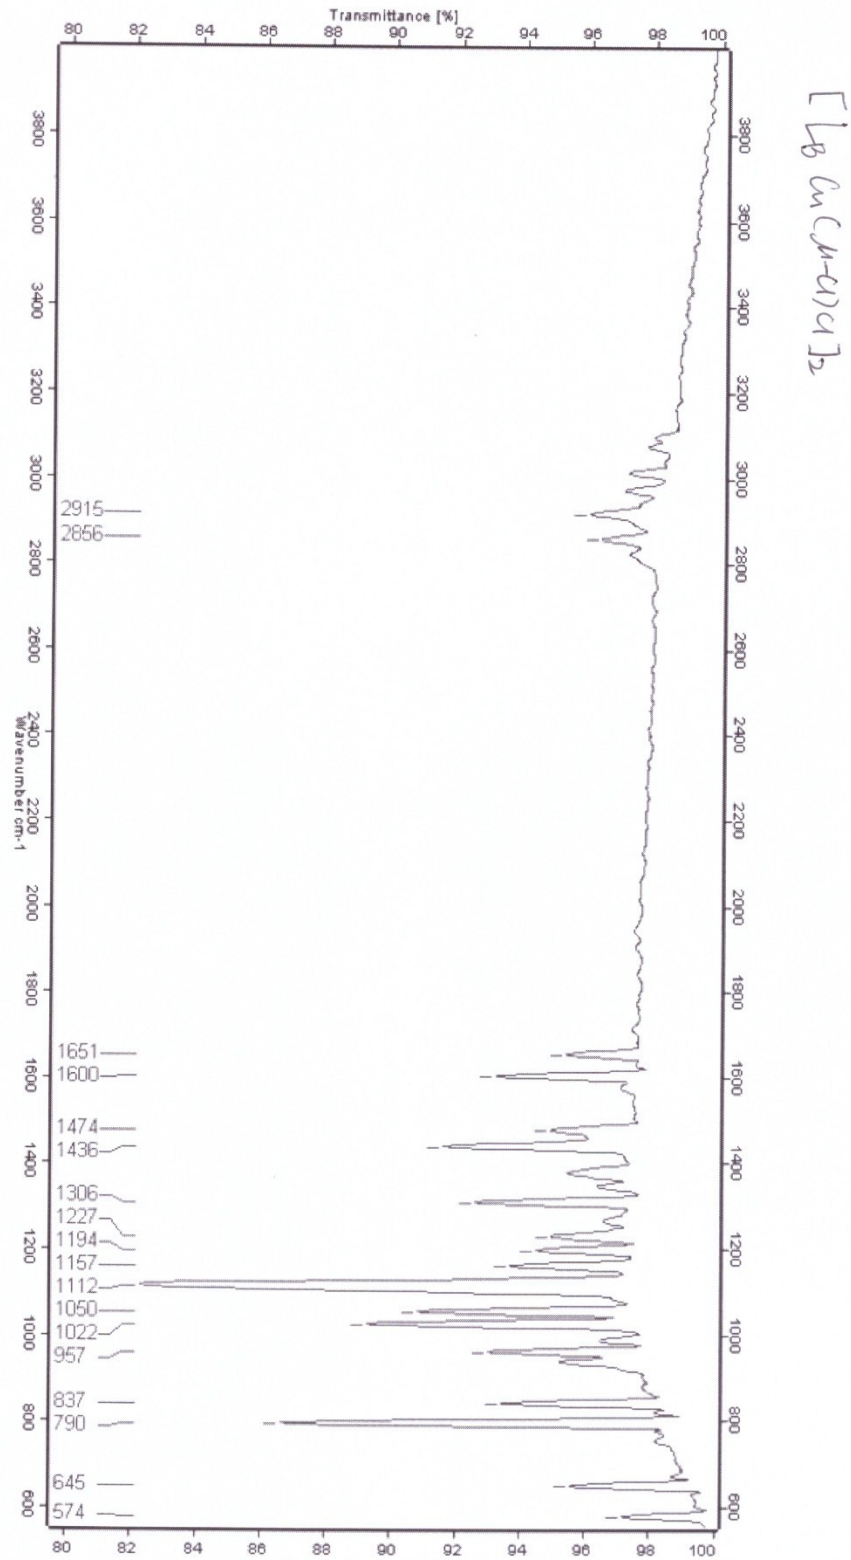

S3

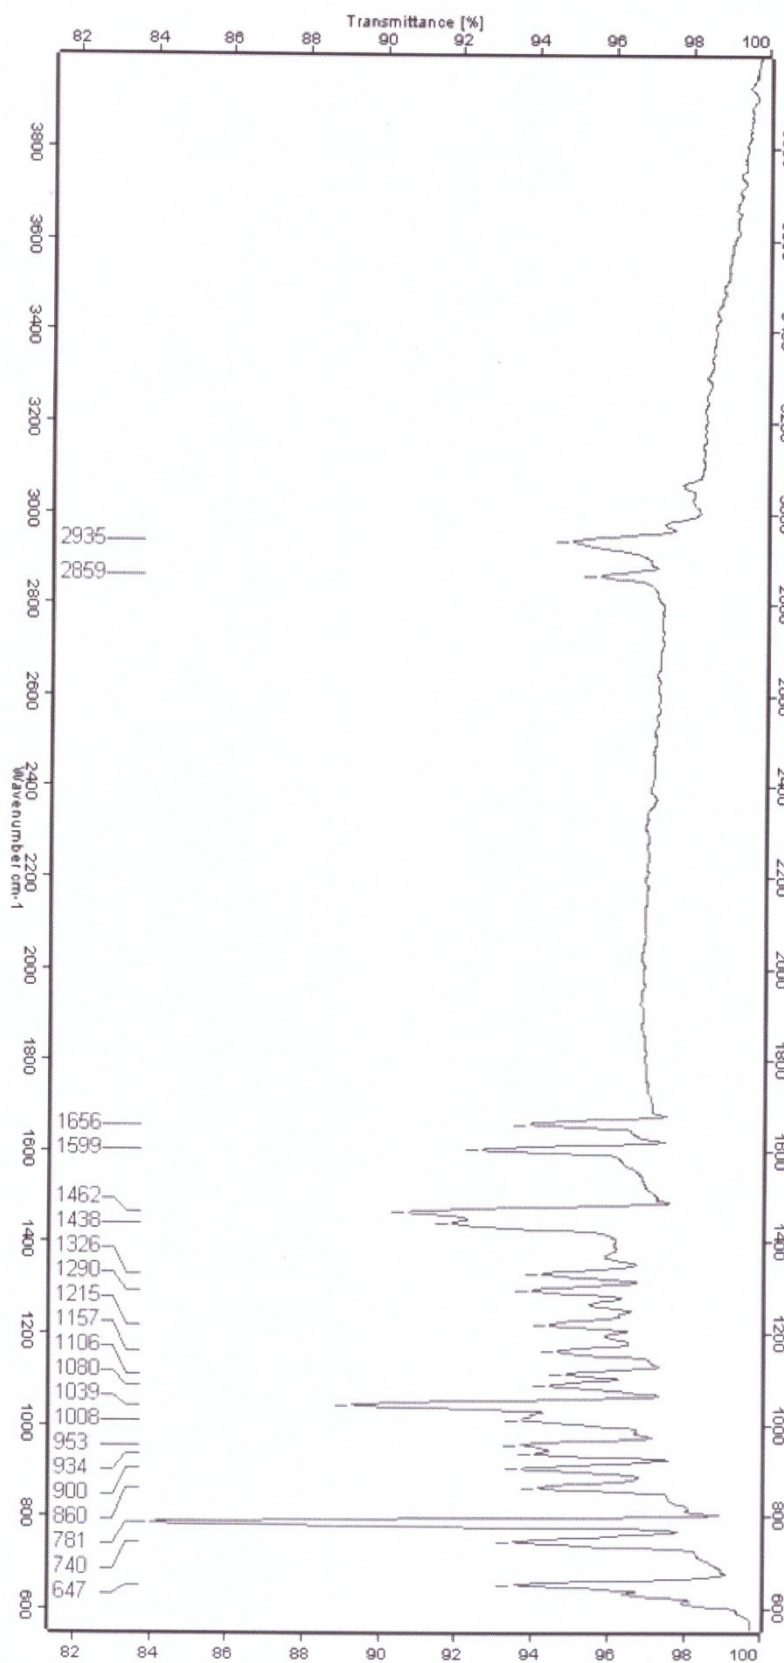

[C<sub>6</sub>H<sub>12</sub>]

FIGURE

FIGURE

S4

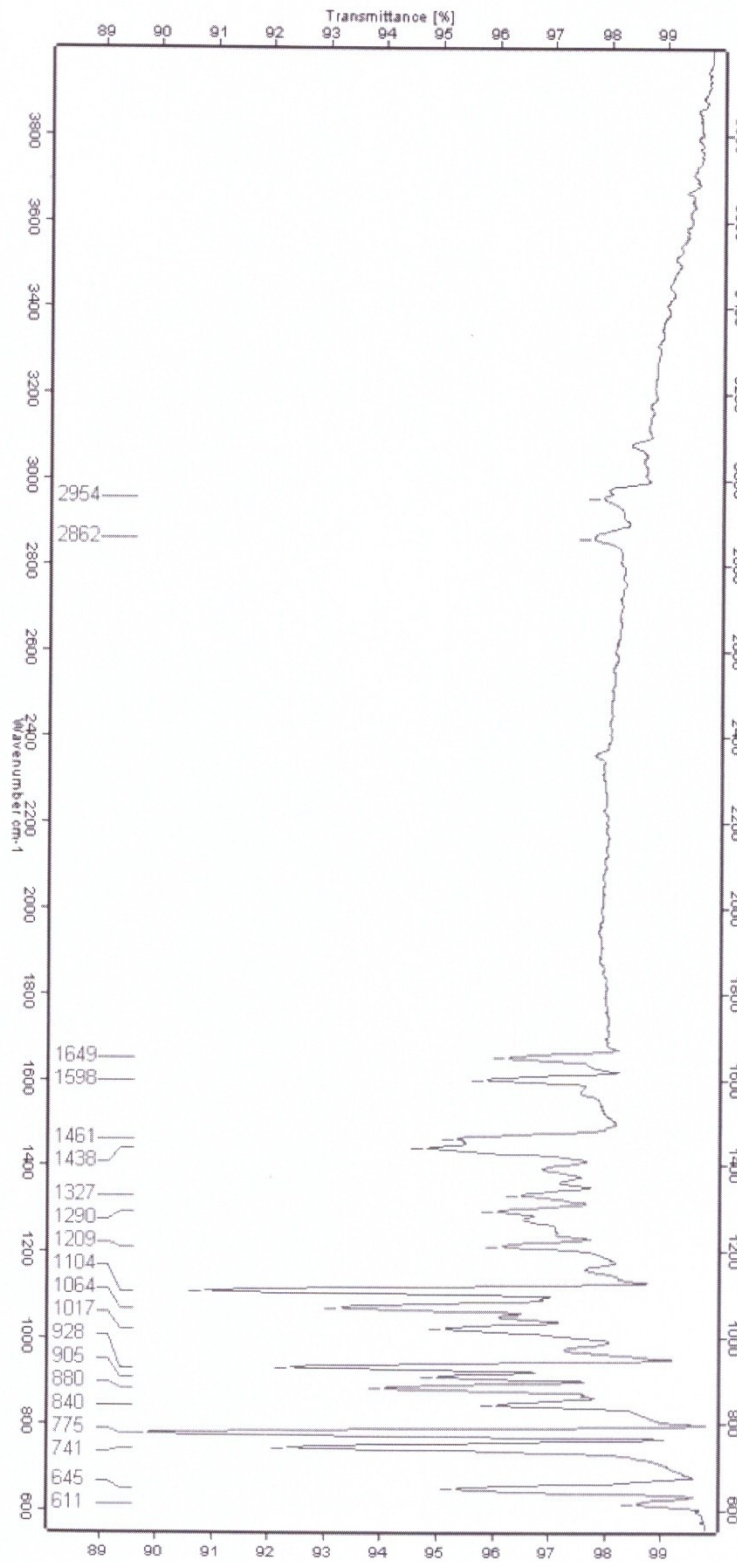

[Pd(CuCl<sub>2</sub>)]

FIGURE S5

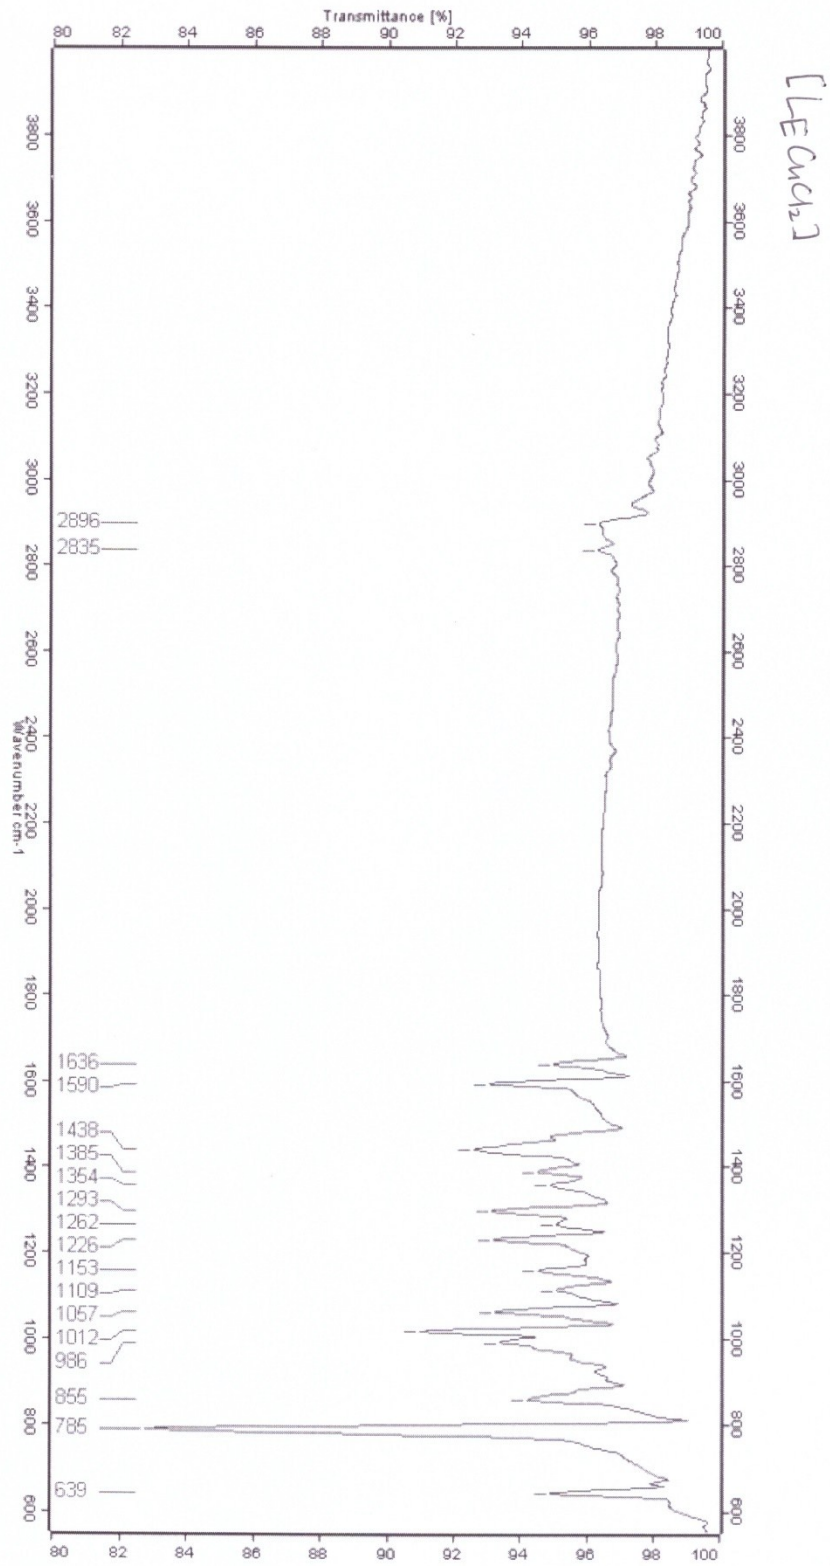



FIGURE S6

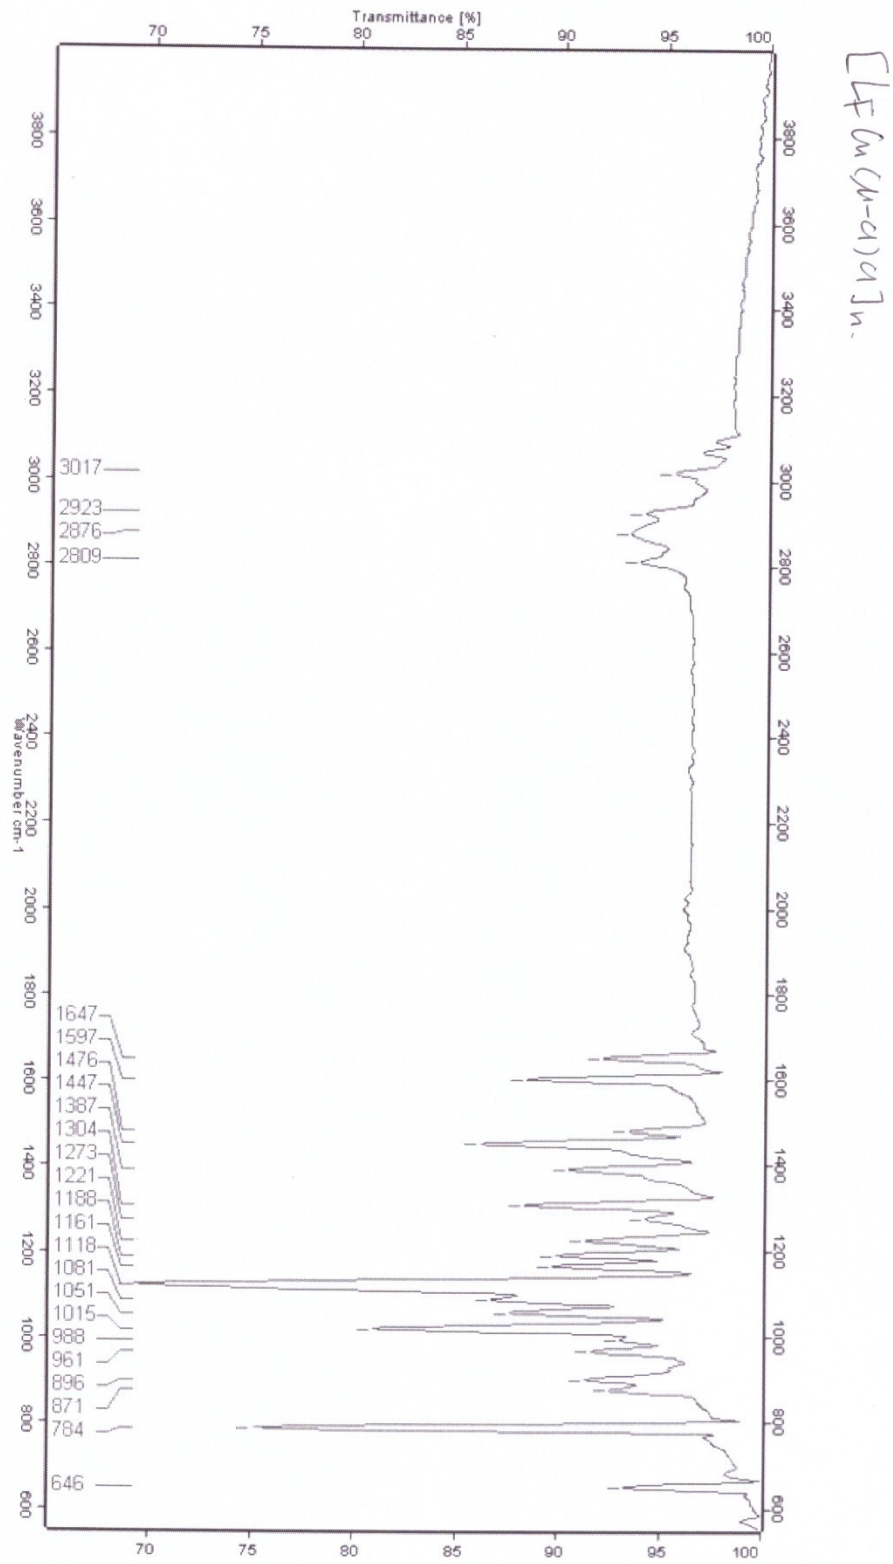



FIGURE S7

| Eager Xperience Summarize Results   |             |             |             |         | Eager Xperience Summarize Results   |             |             |             |         |
|-------------------------------------|-------------|-------------|-------------|---------|-------------------------------------|-------------|-------------|-------------|---------|
| Date : 2018-02-28 at 08:44:38       |             |             |             |         | Date : 2018-02-28 at 08:44:49       |             |             |             |         |
| Method Name : NCHS                  |             |             |             |         | Method Name : NCHS                  |             |             |             |         |
| Method Filename : EA-C_20180226.mth |             |             |             |         | Method Filename : EA-C_20180226.mth |             |             |             |         |
| Group No : 1                        |             |             |             |         |                                     |             |             |             |         |
| Sample Name                         | Element %   | Carbon      | Hydrogen    | Sulphur | Sample Name                         | Element %   | Carbon      | Hydrogen    | Sulphur |
| IA_CuCl [L6CuCl3]                   | 13.46959114 | 38.71767426 | 4.882183075 | 0       | IA_CuCl [L6CuCl3]                   | 11.99687576 | 41.15446854 | 4.890295506 | 0       |
| IA_CuCl                             | 13.25759125 | 38.61170578 | 4.871536732 | 0       | IA_CuCl [L6CuCl3]                   | 11.90109921 | 41.09791183 | 4.88745857  | 0       |
| Component Name Average              |             |             |             |         | Component Name Average              |             |             |             |         |
| Nitrogen                            | 13.36359119 |             |             |         | Nitrogen                            | 11.94898748 |             |             |         |
| Carbon                              | 38.66469002 |             |             |         | Carbon                              | 41.12619019 |             |             |         |
| Hydrogen                            | 4.876859903 |             |             |         | Hydrogen                            | 4.889020681 |             |             |         |
| Sulphur                             | 0           |             |             |         | Sulphur                             | 0           |             |             |         |
| Group No : 2                        |             |             |             |         |                                     |             |             |             |         |
| Sample Name                         | Element %   | Carbon      | Hydrogen    | Sulphur | Sample Name                         | Element %   | Carbon      | Hydrogen    | Sulphur |
| IA_CuCl [L6CuCl3]                   | 9.192878723 | 35.97859192 | 4.02003864  | 0       | IA_CuCl [L6CuCl3]                   | 13.12195015 | 40.93544006 | 5.30657959  | 0       |
| IA_CuCl                             | 9.114869118 | 36.03707123 | 4.01180172  | 0       | IA_CuCl [L6CuCl3]                   | 12.86294174 | 40.7428894  | 5.235087395 | 0       |
| Component Name Average              |             |             |             |         | Component Name Average              |             |             |             |         |
| Nitrogen                            | 9.15387392  |             |             |         | Nitrogen                            | 12.99244595 |             |             |         |
| Carbon                              | 36.00783157 |             |             |         | Carbon                              | 40.83916473 |             |             |         |
| Hydrogen                            | 4.015927792 |             |             |         | Hydrogen                            | 5.270833492 |             |             |         |
| Sulphur                             | 0           |             |             |         | Sulphur                             | 0           |             |             |         |
| Group No : 3                        |             |             |             |         |                                     |             |             |             |         |
| Sample Name                         | Element %   | Carbon      | Hydrogen    | Sulphur | Sample Name                         | Element %   | Carbon      | Hydrogen    | Sulphur |
| IA_CuCl [L6CuCl3]                   | 11.93679333 | 44.59290695 | 5.48209533  | 0       | IA_CuCl [L6CuCl3]                   | 8.981668472 | 38.65621185 | 4.508579254 | 0       |
| IA_CuCl                             | 12.08079624 | 44.66499329 | 5.466984272 | 0       | IA_CuCl [L6CuCl3]                   | 9.010733604 | 38.71915817 | 4.492286682 | 0       |
| Component Name Average              |             |             |             |         | Component Name Average              |             |             |             |         |
| Nitrogen                            | 12.00879478 |             |             |         | Nitrogen                            | 8.996201038 |             |             |         |
| Carbon                              | 44.62895012 |             |             |         | Carbon                              | 38.68768501 |             |             |         |
| Hydrogen                            | 5.474541903 |             |             |         | Hydrogen                            | 4.500432968 |             |             |         |
| Sulphur                             | 0           |             |             |         | Sulphur                             | 0           |             |             |         |

FIGURE S8

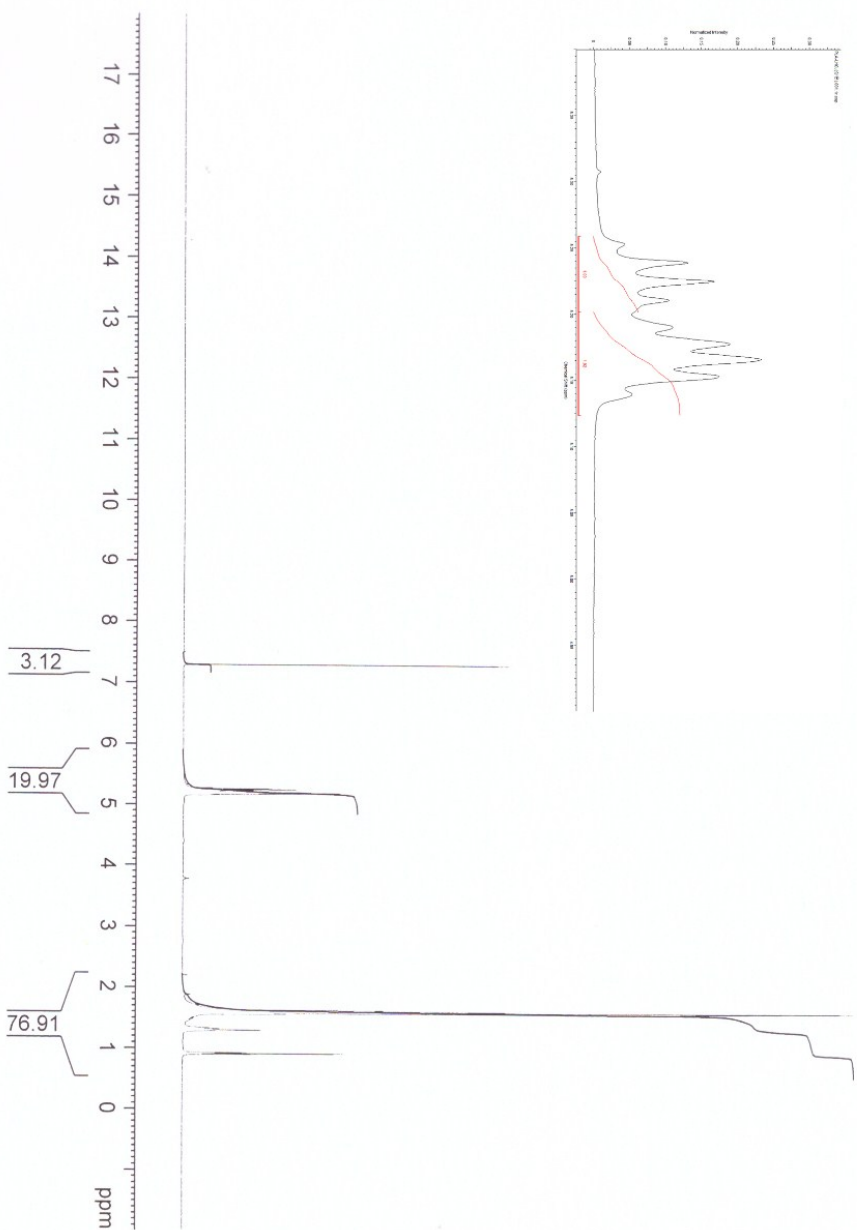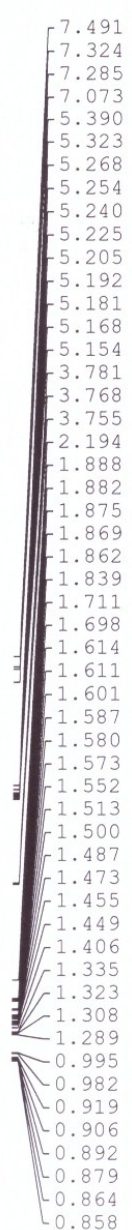

PLA-LHCU  
 $[L\text{-}C_6H_7O_2]_n$  PLA (H)

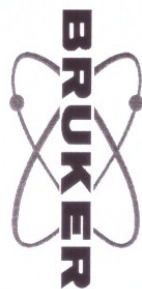

Current Data Parameters  
 NAME Sep13-2018  
 EXPNO 25  
 PROCNO 1

F2 - Acquisition Parameters  
 Date\_ 20180913  
 Time 19.56  
 INSTRUM spect  
 PROBHD 5 mm PABBO BB-  
 PULPROG zg30  
 TD 65536  
 SOLVENT CDCl3  
 NS 16  
 DS 2  
 SWH 10000.000 Hz  
 FIDRES 0.152588 Hz  
 AQ 3.2767999 sec  
 RG 456  
 DW 50.000 usec  
 DE 6.50 usec  
 TE 298.1 K  
 D1 1.00000000 sec  
 TD0 1

===== CHANNEL f1 =====  
 SFO1 500.1340012 MHz  
 NUC1 1H  
 P1 11.20 usec  
 PLW1 24.00000000 W

F2 - Processing parameters  
 SI 65536  
 SF 500.1500000 MHz  
 WDW EM  
 SSB 0  
 LB 0.30 Hz  
 GB 0  
 PC 1.00

FIGURE S9

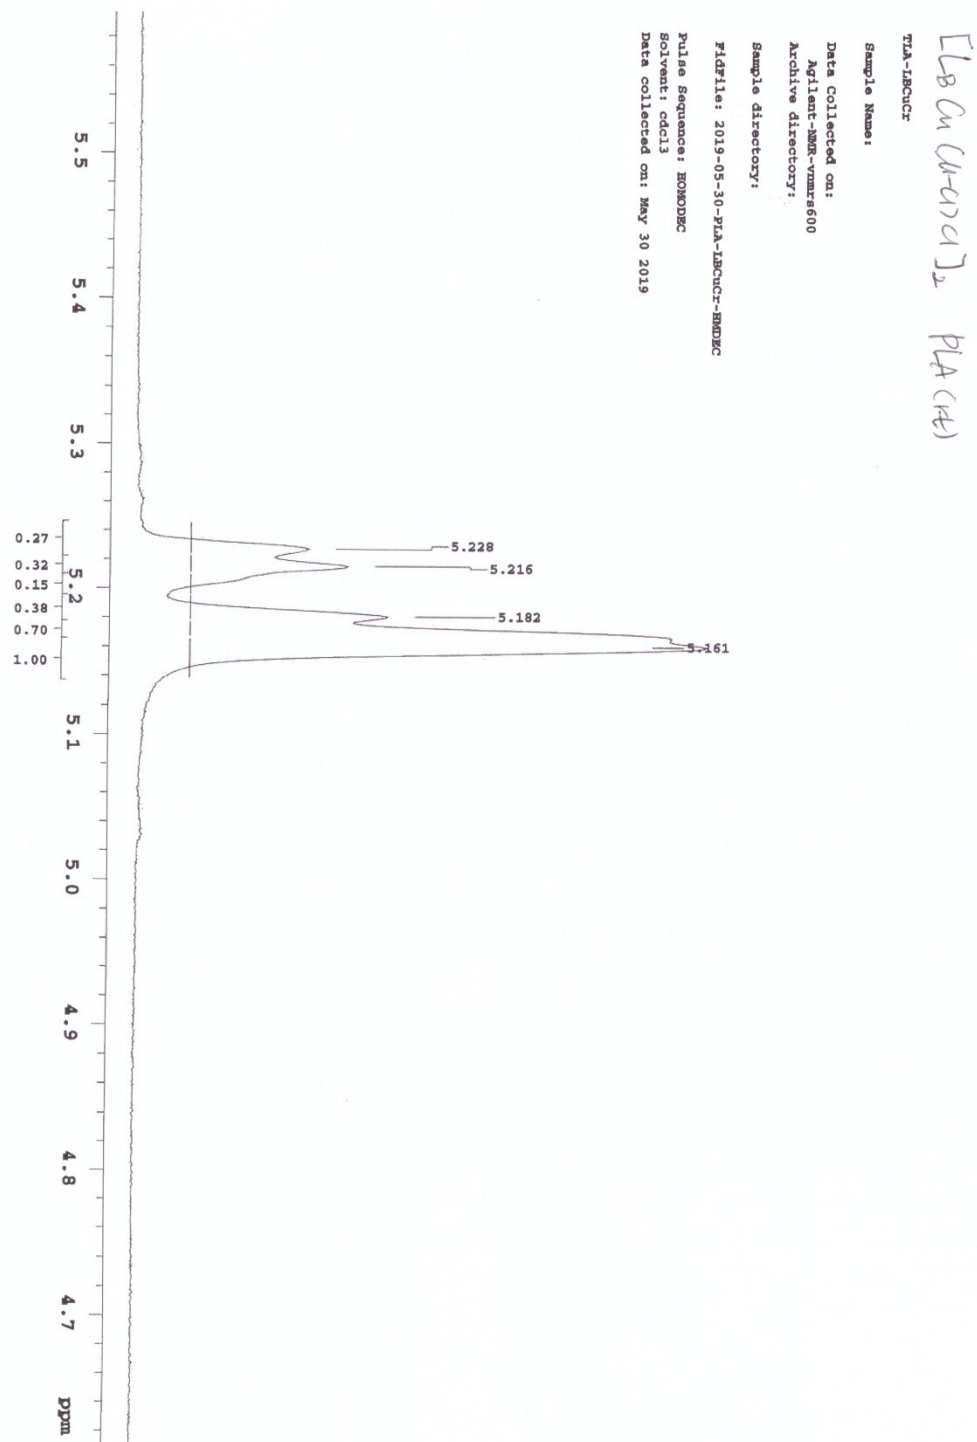

FIGURE S9-1

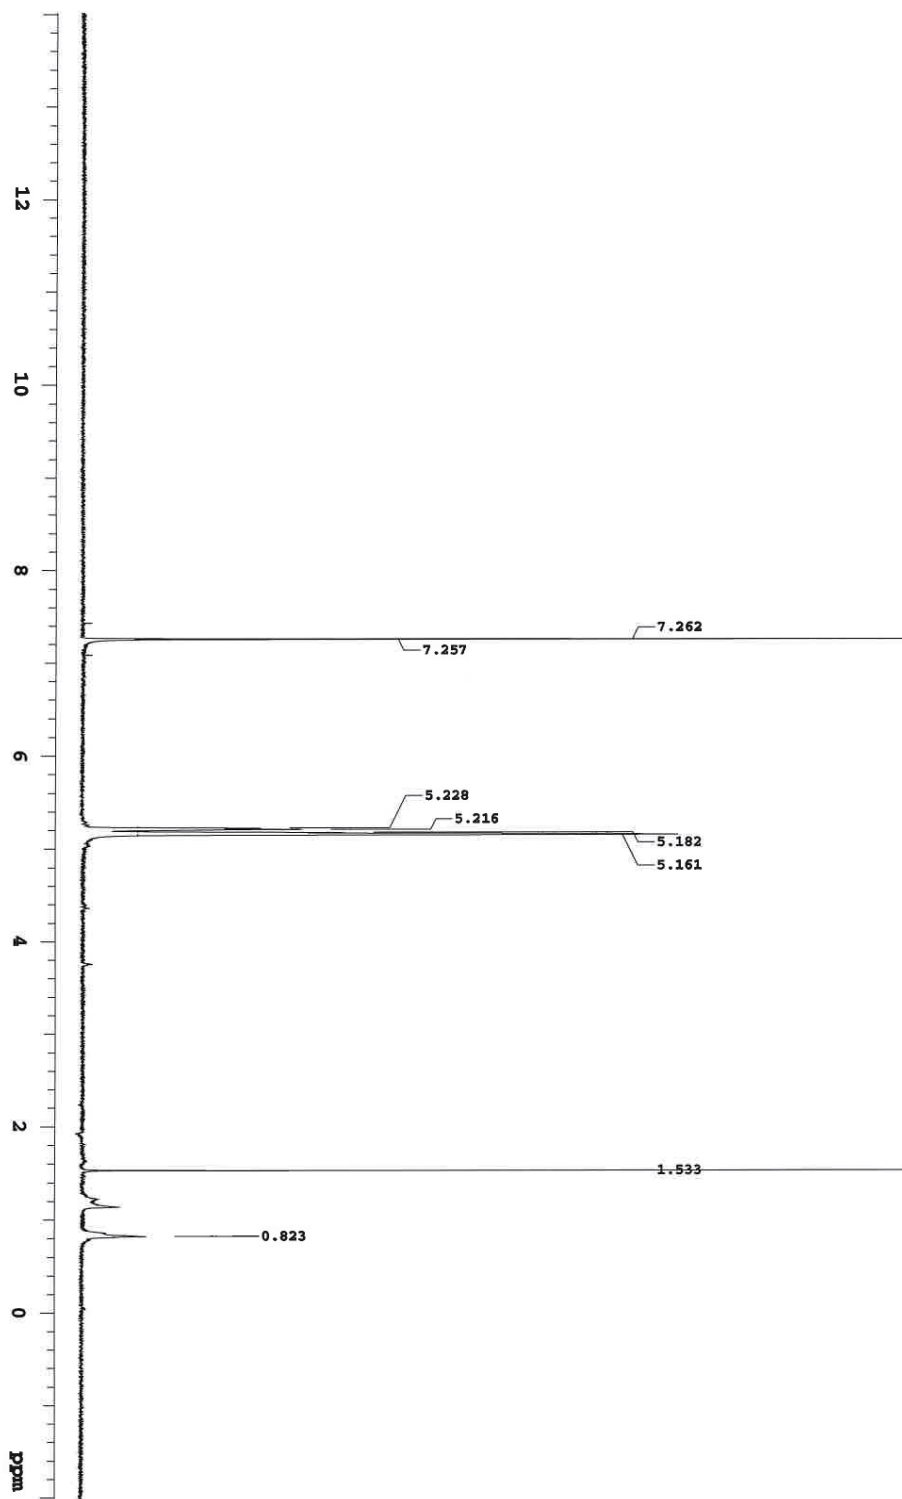

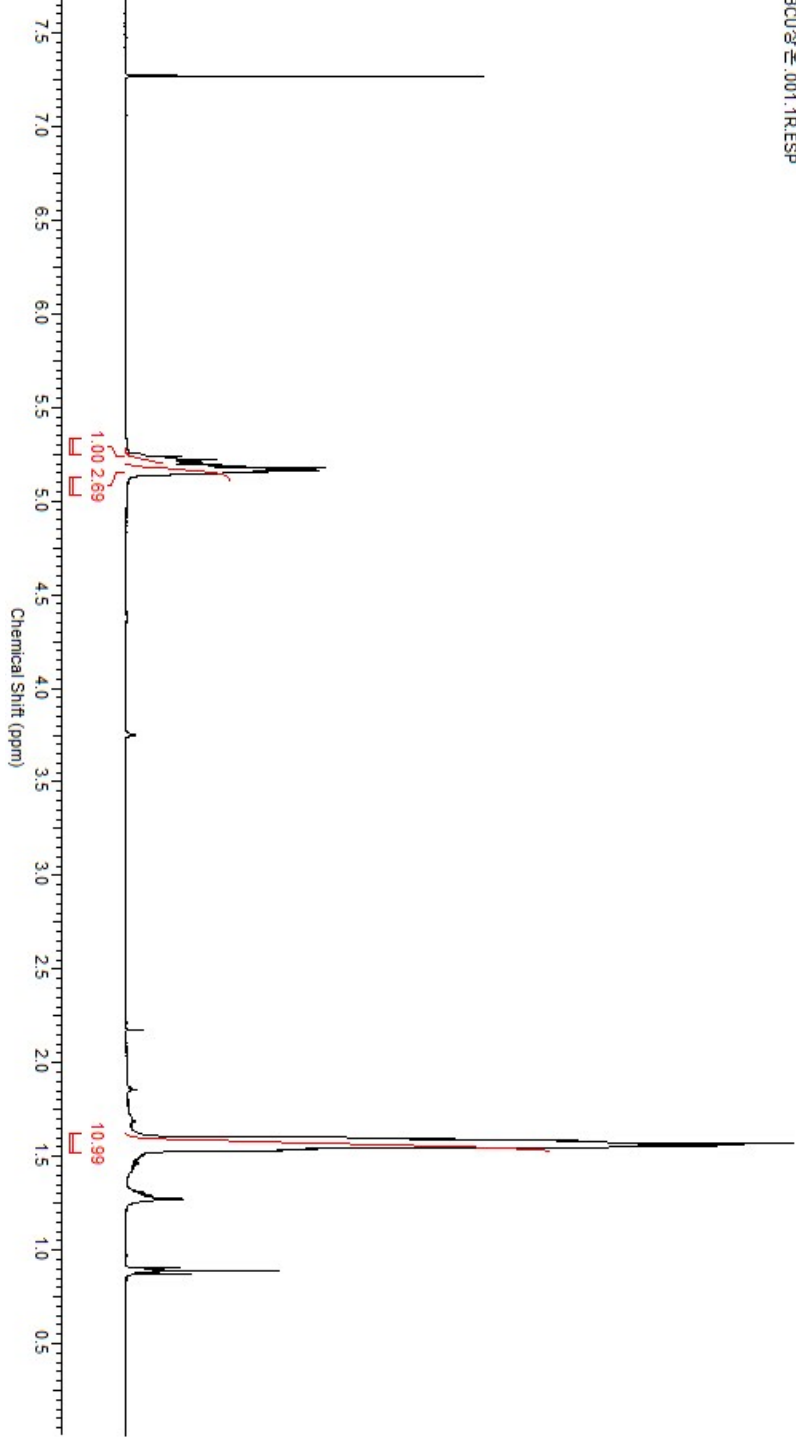

FIGURE S9-2

FIGURE S10

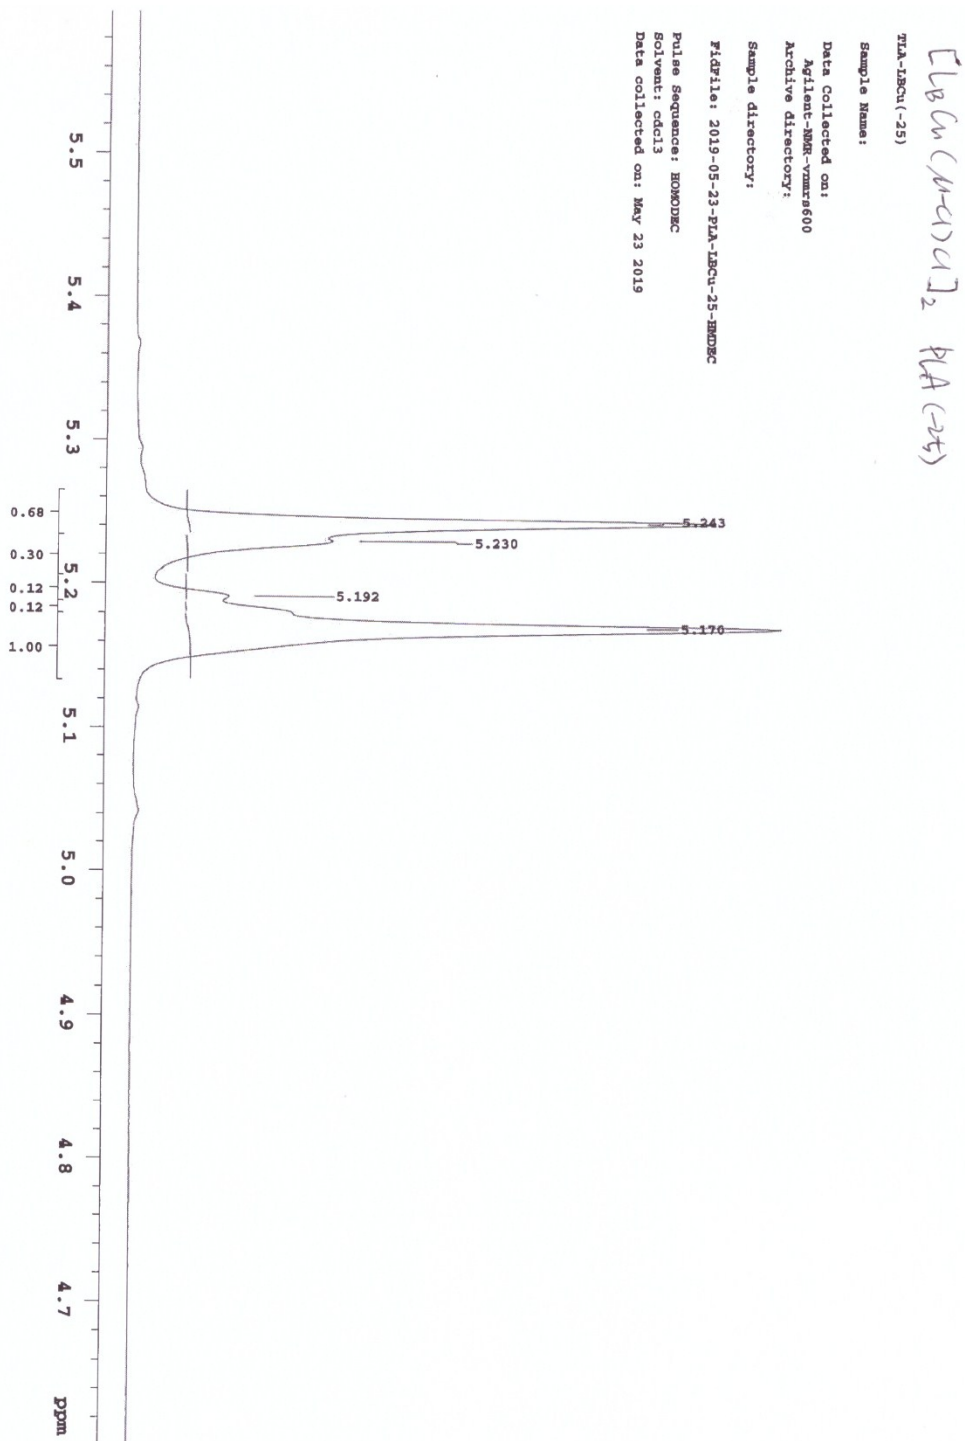



FIGURE S10-1

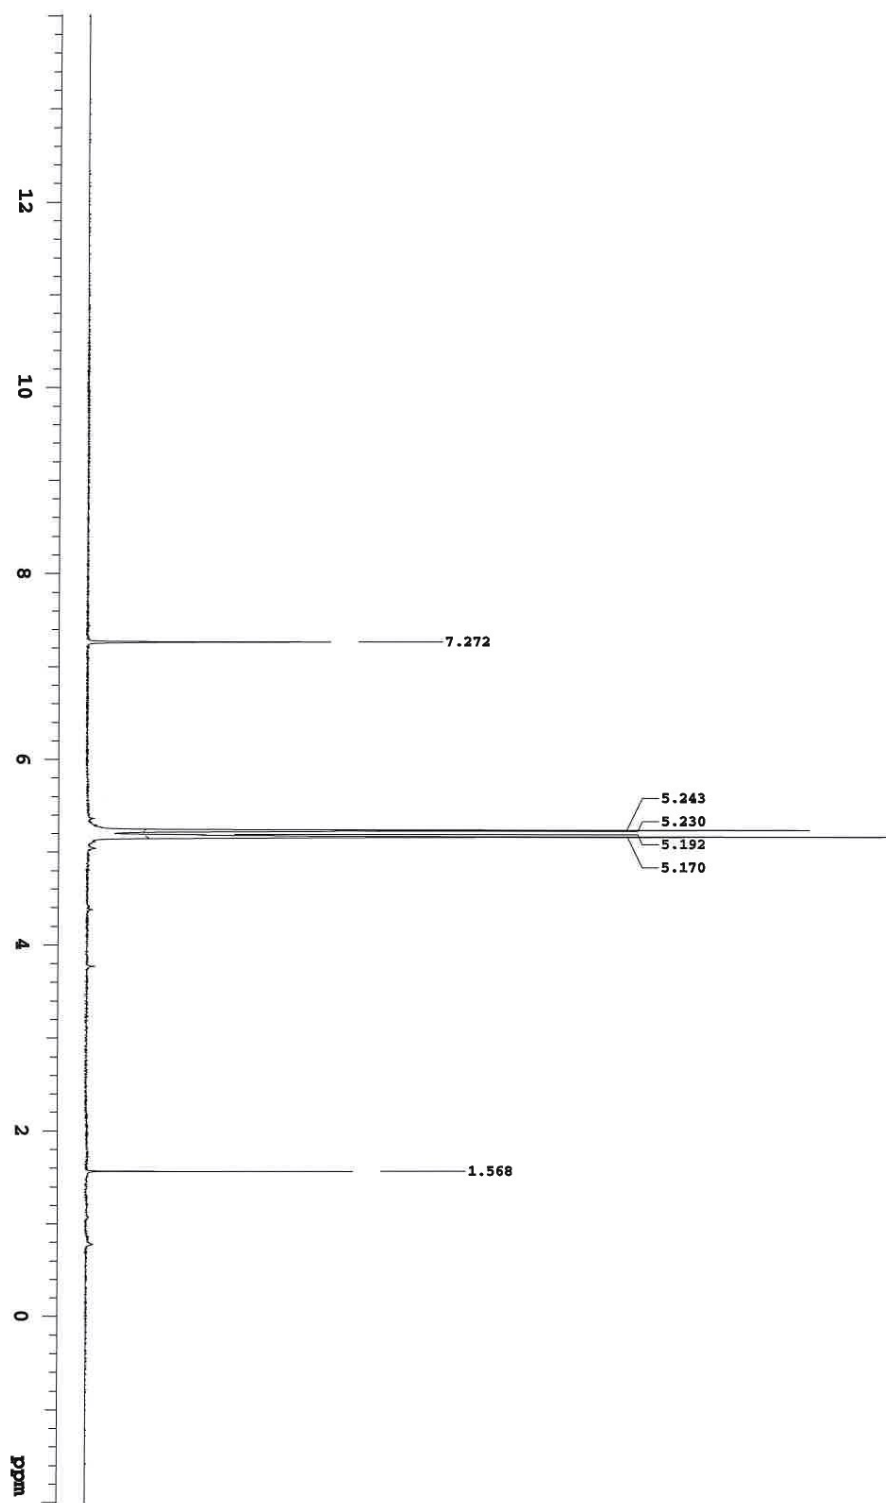

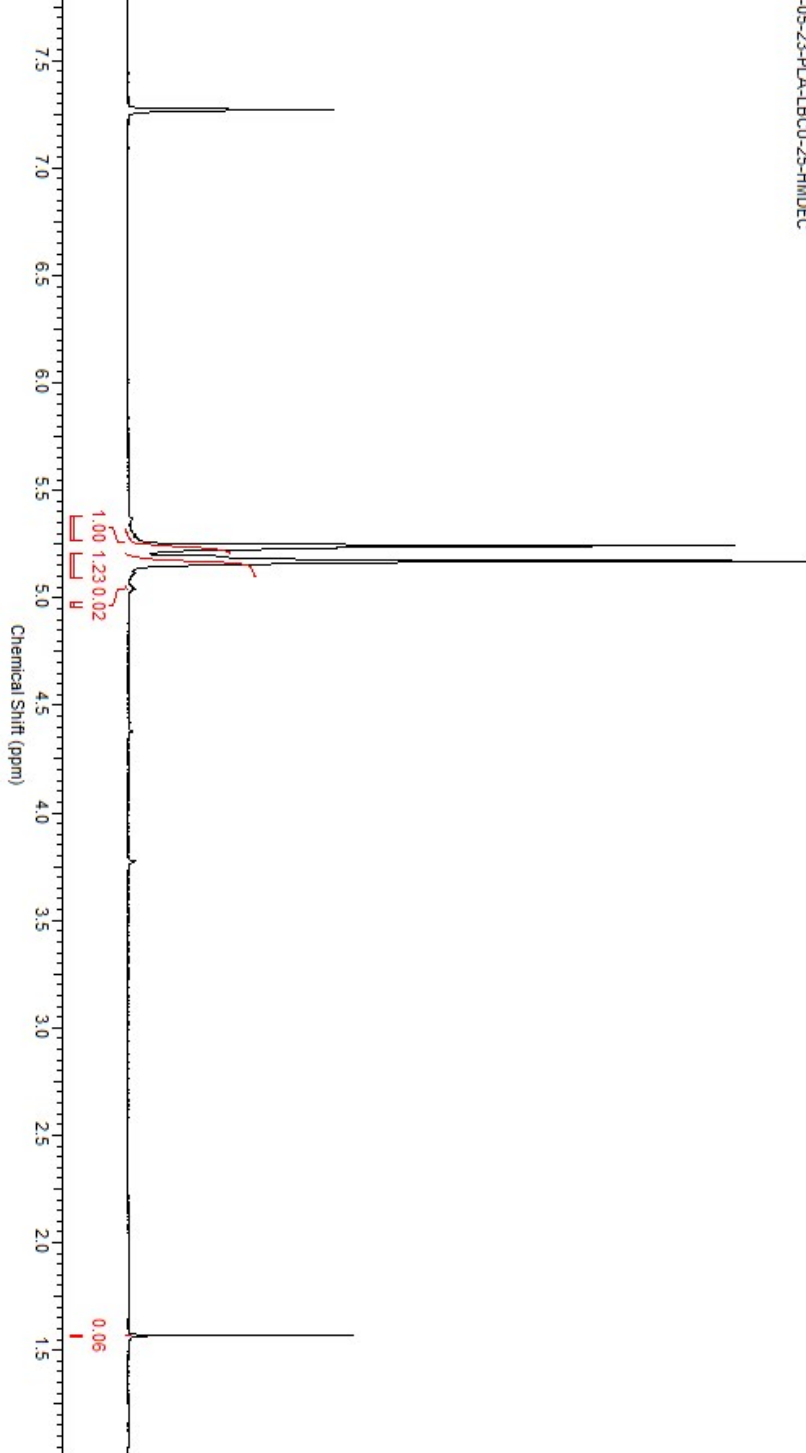

FIGURE S10-2

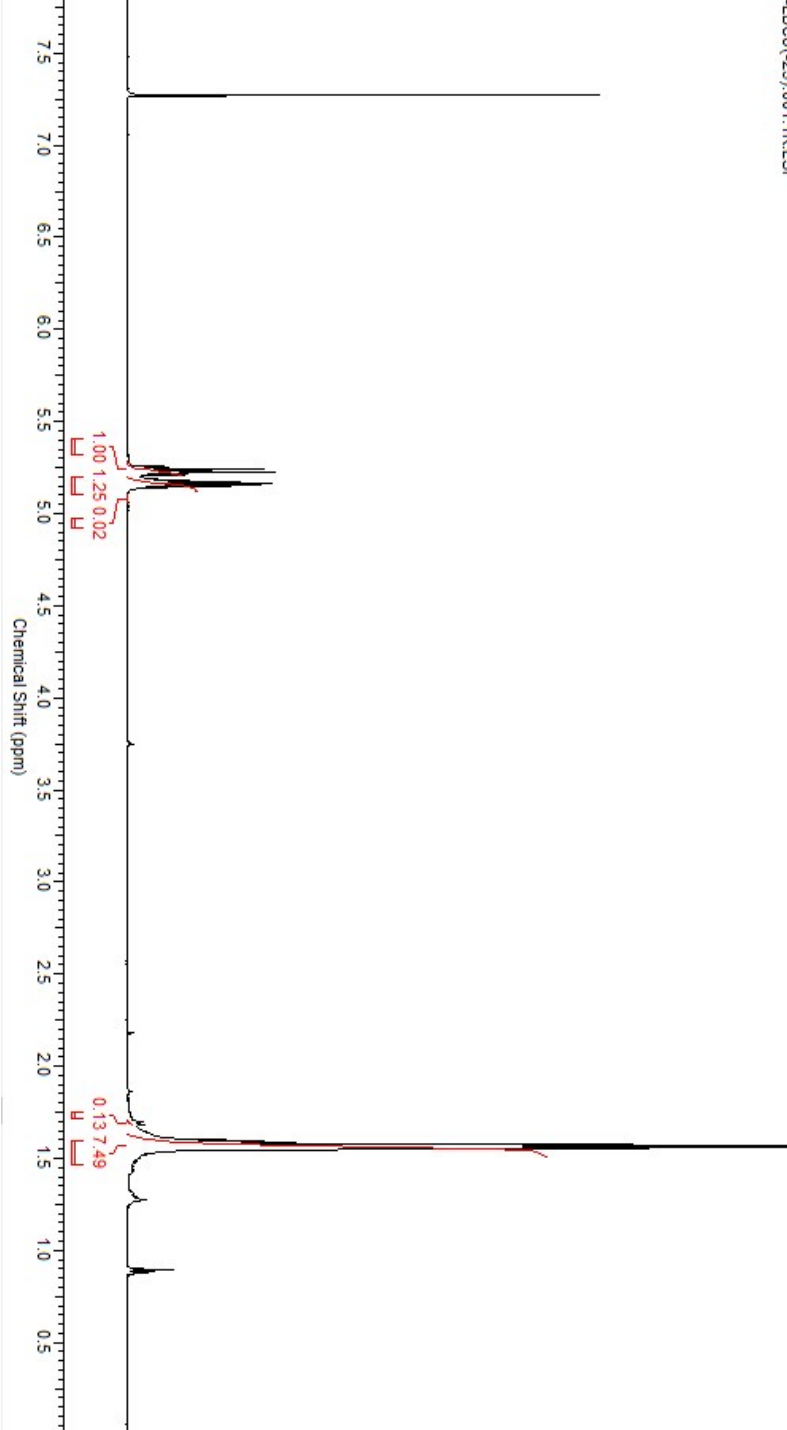

FIGURE S10-3

FIGURE S11

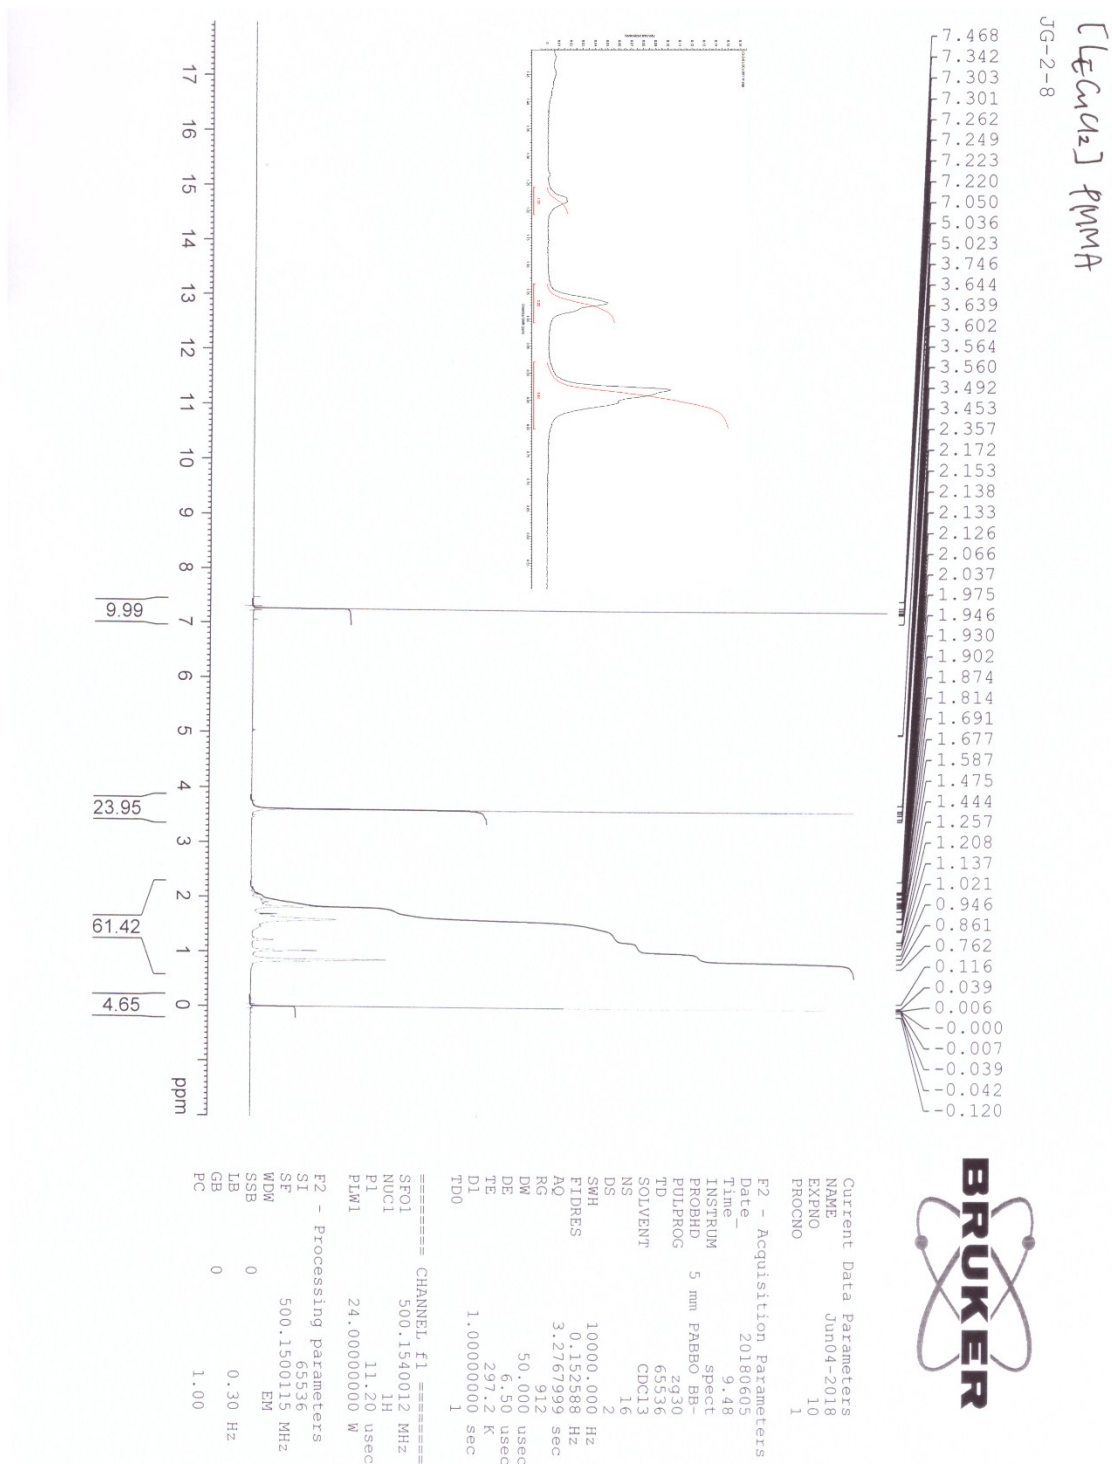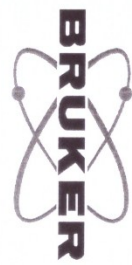

1 **Table S1**

|                                            | <b>[L<sub>B</sub>Cu(μ-Cl)Cl]<sub>2</sub></b>                                                  | <b>[L<sub>C</sub>CuCl<sub>2</sub>]</b>                           | <b>[L<sub>E</sub>CuCl<sub>2</sub>]</b>                           | <b>[L<sub>F</sub>CuCl<sub>2</sub>]</b>                             |
|--------------------------------------------|-----------------------------------------------------------------------------------------------|------------------------------------------------------------------|------------------------------------------------------------------|--------------------------------------------------------------------|
| Empirical formula                          | C <sub>18</sub> H <sub>24</sub> Cl <sub>4</sub> Cu <sub>2</sub> N <sub>4</sub> O <sub>2</sub> | C <sub>13</sub> H <sub>19</sub> Cl <sub>2</sub> CuN <sub>3</sub> | C <sub>11</sub> H <sub>17</sub> Cl <sub>2</sub> CuN <sub>3</sub> | C <sub>10</sub> H <sub>14</sub> Cl <sub>2</sub> CuN <sub>2</sub> O |
| Formula weight                             | 597.29                                                                                        | 351.75                                                           | 325.71                                                           | 312.67                                                             |
| Temperature (K)                            | 100(2)                                                                                        | 200(2)                                                           | 200(2)                                                           | 200(2)                                                             |
| Wavelength (Å)                             | 0.630                                                                                         | 0.71073                                                          | 0.610                                                            | 0.610                                                              |
| Crystal system                             | Monoclinic                                                                                    | Monoclinic                                                       | Triclinic                                                        | Monoclinic                                                         |
| Space group                                | P2 <sub>1</sub> /c                                                                            | P2 <sub>1</sub> /n                                               | P-1                                                              | P2 <sub>1</sub> /c                                                 |
| a (Å)                                      | 8.8760(2)                                                                                     | 11.3629(2)                                                       | 7.2770(2)                                                        | 19.137(4)                                                          |
| b (Å)                                      | 6.9330(1)                                                                                     | 6.8532(1)                                                        | 8.9970(2)                                                        | 8.7180(2)                                                          |
| c (Å)                                      | 18.664(4)                                                                                     | 19.328(3)                                                        | 11.587(2)                                                        | 7.4750(2)                                                          |
| α (°)                                      | 90                                                                                            | 90                                                               | 96.81(3)                                                         | 90                                                                 |
| β (°)                                      | 93.56(3)                                                                                      | 104.988(4)                                                       | 102.67(3)                                                        | 93.40(3)                                                           |
| γ (°)                                      | 90                                                                                            | 90                                                               | 112.98(3)                                                        | 90                                                                 |
| Volume (Å <sup>3</sup> ), Z                | 1146.3(4), 2                                                                                  | 1453.9(4), 4                                                     | 663.5(3), 2                                                      | 1244.9(4), 4                                                       |
| Density (calculated) (Mg m <sup>-3</sup> ) | 1.730                                                                                         | 1.607                                                            | 1.630                                                            | 1.668                                                              |
| Absorption coefficient (mm <sup>-1</sup> ) | 1.677                                                                                         | 1.859                                                            | 1.332                                                            | 1.419                                                              |
| F(000)                                     | 604                                                                                           | 724                                                              | 334                                                              | 636                                                                |
| Crystal size (mm <sup>3</sup> )            | 0.16 × 0.13 × 0.10                                                                            | 0.28 × 0.14 × 0.10                                               | 0.07 × 0.07 × 0.055                                              | 0.07 × 0.06 × 0.035                                                |
| Theta range for data collection (°)        | 2.779 to 25.996                                                                               | 2.18 to 28.35                                                    | 1.588 to 26.996                                                  | 2.204 to 26.997                                                    |
| Index ranges                               | -12 ≤ h ≤ 12                                                                                  | -15 ≤ h ≤ 14                                                     | -10 ≤ h ≤ 10                                                     | -27 ≤ h ≤ 28                                                       |

|                                                  |                                                |                                                |                                                |                                                |
|--------------------------------------------------|------------------------------------------------|------------------------------------------------|------------------------------------------------|------------------------------------------------|
|                                                  | $-9 \leq k \leq 9$                             | $-9 \leq k \leq 8$                             | $-13 \leq k \leq 13$                           | $-12 \leq k \leq 12$                           |
|                                                  | $-25 \leq l \leq 25$                           | $-25 \leq l \leq 23$                           | $-17 \leq l \leq 17$                           | $-11 \leq l \leq 11$                           |
| Reflections collected                            | 9052                                           | 10348                                          | 7894                                           | 14302                                          |
| Independent reflections                          | 3086 [R(int) = 0.1035]                         | 3615 [R(int) = 0.0675]                         | 4278 [R(int) = 0.0234]                         | 4258 [R(int) = 0.0763]                         |
| Completeness to theta                            | 92.5 % (22.210°)                               | 99.5 % (28.35°)                                | 95.5 % (21.469°)                               | 99.6 %                                         |
| Refinement method                                | Full-matrix least-squares<br>on F <sup>2</sup> |
| Data / restraints / parameters                   | 3086 / 6 / 107                                 | 3615 / 0 / 172                                 | 4278 / 0 / 156                                 | 4258 / 0 / 147                                 |
| Goodness-of-fit on F <sup>2</sup>                | 1.077                                          | 1.110                                          | 1.093                                          | 1.083                                          |
| Final R indices [ $I > 2\sigma(I)$ ]             | $R_1 = 0.0564$<br>$wR_2 = 0.1579$              | $R_1 = 0.0512$<br>$wR_2 = 0.0918$              | $R_1 = 0.0302$<br>$wR_2 = 0.0874$              | $R_1 = 0.0360$<br>$wR_2 = 0.1027$              |
| R indices (all data)                             | $R_1 = 0.0573$<br>$wR_2 = 0.1587$              | $R_1 = 0.1169$<br>$wR_2 = 0.1519$              | $R_1 = 0.0305$<br>$wR_2 = 0.0878$              | $R_1 = 0.0372$<br>$wR_2 = 0.1038$              |
| Largest diff. peak and hole (e.Å <sup>-3</sup> ) | 1.625 and -1.622                               | 1.094 and -1.740                               | 0.585 and -0.962                               | 0.941 and -1.058                               |



| $[\text{L}_B\text{Cu}(\mu\text{-Cl})\text{Cl}]_2$ |           | $[\text{L}_C\text{CuCl}_2]$ |           | $[\text{L}_E\text{CuCl}_2]$ |           | $[\text{L}_F\text{CuCl}_2]$ |           |
|---------------------------------------------------|-----------|-----------------------------|-----------|-----------------------------|-----------|-----------------------------|-----------|
| <b>Bond lengths (Å)</b>                           |           |                             |           |                             |           |                             |           |
| Cu(1)-N(1)                                        | 2.032(2)  | Cu(1)-N(3)                  | 2.041(5)  | Cu(1)-N(1)                  | 2.0652(1) | Cu(1)-N(1)                  | 2.0332(1) |
| Cu(1)-N(2)                                        | 2.039(2)  | Cu(1)-N(2)                  | 1.967(5)  | Cu(1)-N(2)                  | 2.0341(1) | Cu(1)-N(2)                  | 2.0449(1) |
| Cu(1)-Cl(2)                                       | 2.2625(8) | Cu(1)-N(1)                  | 2.088(5)  | Cu(1)-N(3)                  | 2.1163(1) | Cu(1)-Cl(2)                 | 2.2605(5) |
| Cu(1)-Cl(1)                                       | 2.2724(9) | Cu(1)-Cl(2)                 | 2.2379(2) | Cu(1)-Cl(2)                 | 2.2860(7) | Cu(1)-Cl(1)                 | 2.2609(6) |
| N(2)-C(7)                                         | 1.465(3)  | Cu(1)-Cl(1)                 | 2.5855(2) | Cu(1)-Cl(1)                 | 2.4659(1) | N(2)-C(7)                   | 1.4700(2) |
| N(1)-C(1)                                         | 1.336(3)  | C(13)-N(3)                  | 1.330(7)  | N(1)-C(1)                   | 1.3364(2) | N(1)-C(1)                   | 1.3366(2) |
| N(1)-C(5)                                         | 1.357(3)  | C(9)-N(3)                   | 1.363(7)  | N(1)-C(5)                   | 1.3547(2) | N(1)-C(5)                   | 1.3503(2) |
| N(2)-C(6)                                         | 1.278(3)  | N(2)-C(8)                   | 1.269(7)  | N(2)-C(6)                   | 1.2751(2) | N(2)-C(6)                   | 1.2703(2) |
| <b>Bond angles (°)</b>                            |           |                             |           |                             |           |                             |           |
| N(1)-Cu(1)-N(2)                                   | 80.16(9)  | N(2)-Cu(1)-N(3)             | 79.06(2)  | N(2)-Cu(1)-N(1)             | 78.89(5)  | N(1)-Cu(1)-N(2)             | 79.98(5)  |
| N(1)-Cu(1)-Cl(2)                                  | 170.10(6) | N(3)-Cu(1)-Cl(2)            | 96.93(1)  | N(1)-Cu(1)-Cl(2)            | 89.61(4)  | N(1)-Cu(1)-Cl(2)            | 170.23(3) |
| N(2)-Cu(1)-Cl(2)                                  | 94.05(7)  | N(2)-Cu(1)-Cl(2)            | 156.81(2) | N(2)-Cu(1)-Cl(2)            | 156.49(4) | N(2)-Cu(1)-Cl(2)            | 94.69(4)  |
| N(1)-Cu(1)-Cl(1)                                  | 92.36(6)  | N(3)-Cu(1)-Cl(1)            | 94.49(1)  | N(1)-Cu(1)-Cl(1)            | 101.86(4) | N(1)-Cu(1)-Cl(1)            | 92.69(4)  |
| N(2)-Cu(1)-Cl(1)                                  | 172.43(7) | N(2)-Cu(1)-Cl(1)            | 100.44(2) | N(2)-Cu(1)-Cl(1)            | 96.93(4)  | N(2)-Cu(1)-Cl(1)            | 167.84(3) |
| Cl(2)-Cu(1)-Cl(1)                                 | 93.52(3)  | Cl(2)-Cu(1)-Cl(1)           | 102.65(6) | Cl(2)-Cu(1)-Cl(1)           | 105.53(3) | Cl(2)-Cu(1)-Cl(1)           | 93.88(3)  |
| C(1)-N(1)-C(5)                                    | 118.5(2)  | N(3)-Cu(1)-N(1)             | 159.69(2) | N(1)-Cu(1)-N(3)             | 160.41(4) | C(1)-N(1)-C(5)              | 118.10(1) |
| C(1)-N(1)-Cu(1)                                   | 127.88(2) | N(2)-Cu(1)-N(1)             | 82.08(2)  | N(2)-Cu(1)-N(3)             | 92.36(5)  | C(1)-N(1)-Cu(1)             | 128.06(1) |
| C(5)-N(1)-Cu(1)                                   | 113.50(2) | N(1)-Cu(1)-Cl(2)            | 97.43(1)  | N(3)-Cu(1)-Cl(2)            | 91.92(4)  | C(5)-N(1)-Cu(1)             | 113.76(9) |
| C(6)-N(2)-C(7)                                    | 119.0(2)  | N(1)-Cu(1)-Cl(1)            | 96.30(2)  | N(3)-Cu(1)-Cl(1)            | 96.55(4)  | C(6)-N(2)-C(7)              | 118.89(1) |

Scheme S1

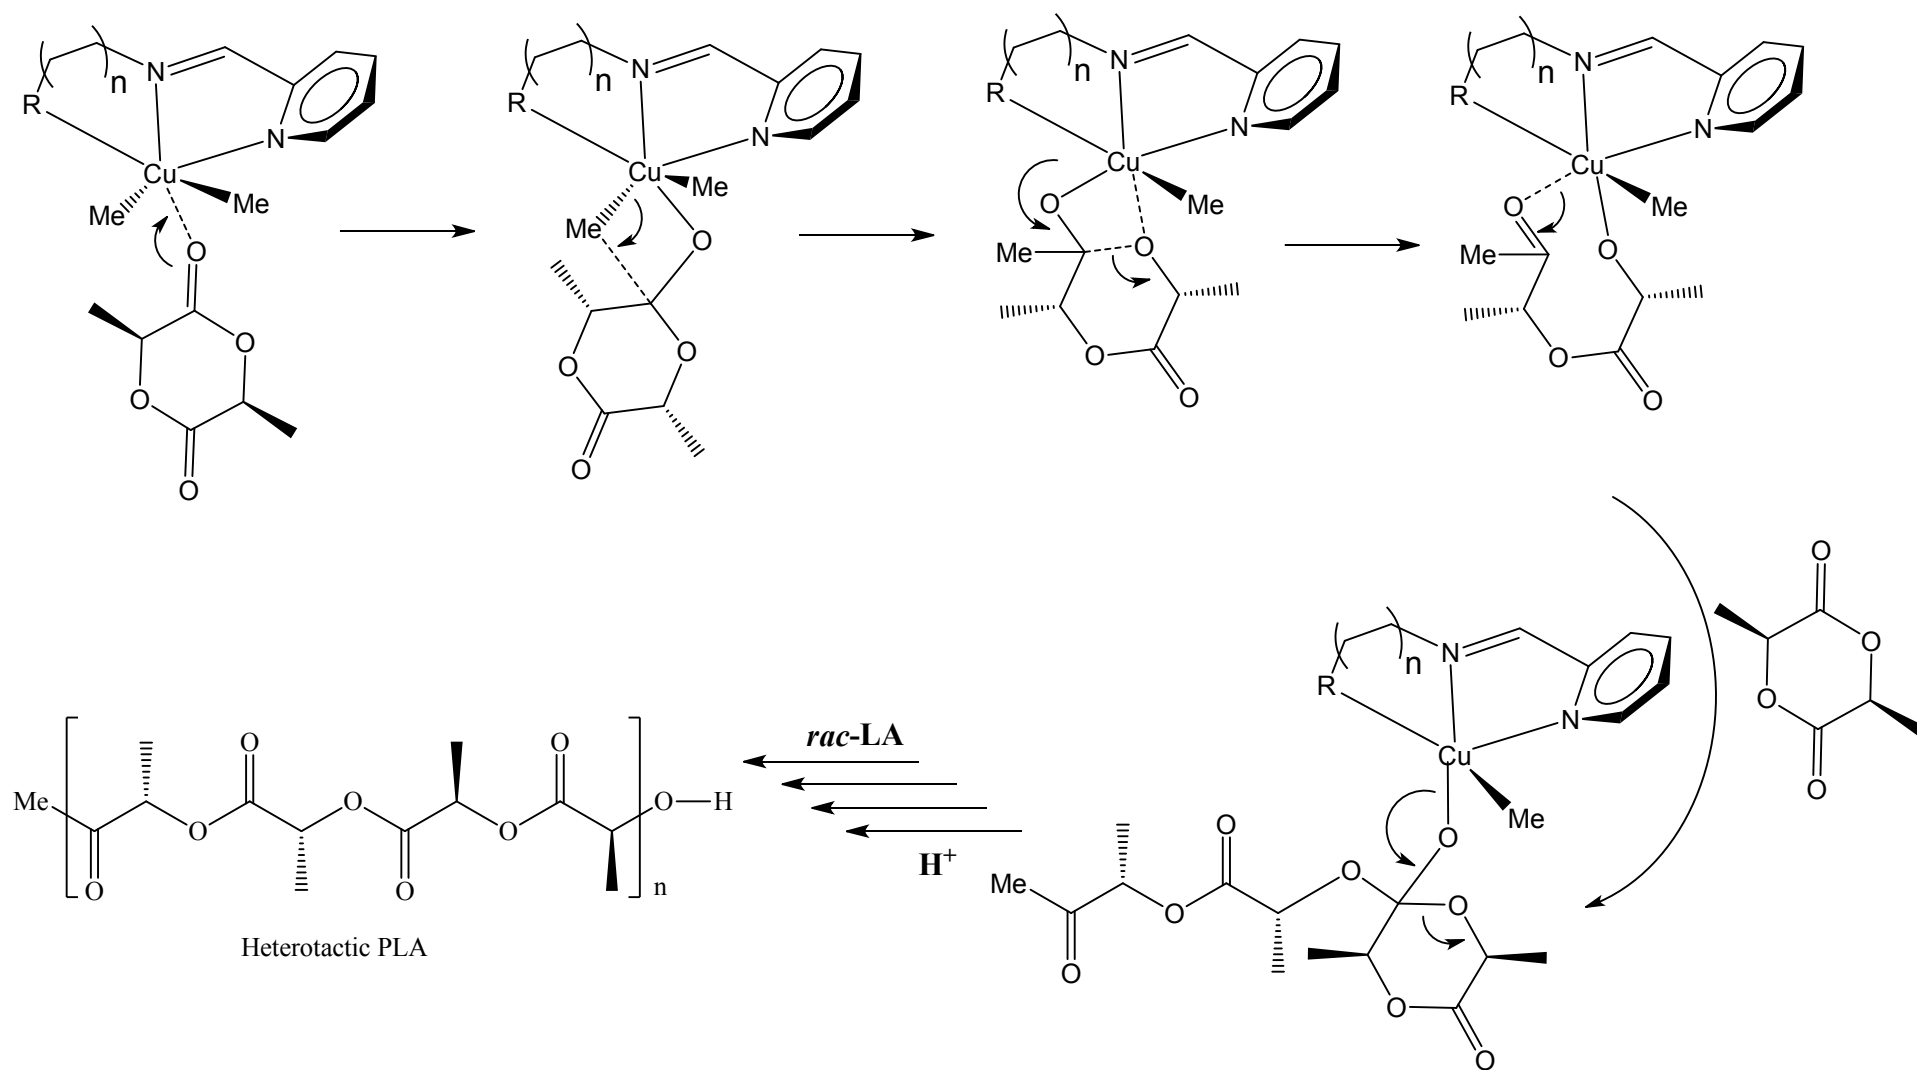

Supplement: d0ra00805b1.pdf [file d0ra00805b1.pdf]
